# Supplementary material for: Mutual synchronization of spin torque nano-oscillators through a long-range and tunable electrical coupling scheme
Source: PubMed Central journal article supplement (PMC5472782; doi:10.1038/ncomms15825), 2017-06-12
Supplement: ncomms15825-s1.pdf [file ncomms15825-s1.pdf]

## 1 Supplement note 1: Characteristics of the non-interacting spin torque oscillators (STOs)

2 **Supplementary Figure 1** shows the properties of each non-interacting STOs. In the measurements  
3 presented in the main text, the dc-current  $I_{DC,2}$  of the oscillator n°2 (STO 2) is fixed to  $I_{DC,2} = +10.6$  mA,  
4 while the dc-current of the oscillator n°1 (STO 1) is swept from +10.5 to +11.8 mA. For these conditions,  
5 the properties of the rf emitted signal are similar i.e. the spectral linewidth (STO 2  $\approx$  1.15 MHz, STO 1  $\approx$   
6 1-1.25 MHz), the emitted power (STO 2  $\approx$  0.44  $\mu$ W, STO 1  $\approx$  0.35-0.52  $\mu$ W) and their nonlinear  
7 parameter  $\nu$  (STO 2  $\approx$  3.4, STO 1  $\approx$  3-4.8). Having chosen these dc current values permits us to stand in  
8 the hypothesis of “almost identical” oscillators<sup>1</sup>, a condition that is particularly true in the middle of the  
9 synchronization bandwidth.

10  
11  
12  
13  
14  
15  
16  
17  
18  
19  
20  
21  
22  
23  
24  
25  
26

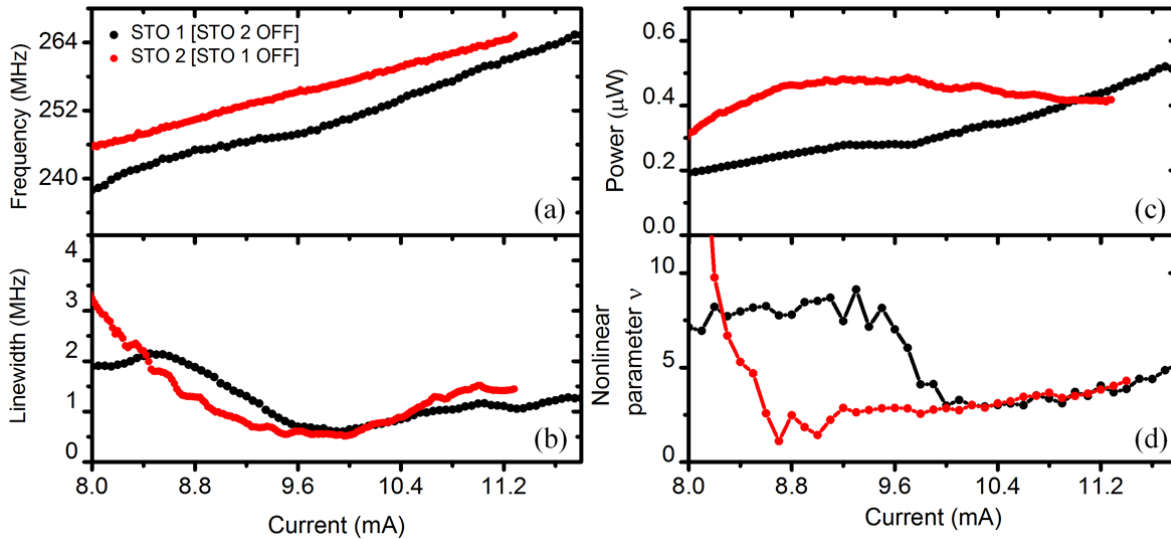

**Supplementary Figure 1:** Properties of the non-interacting STOs. Frequency (a), Linewidth (b), Power (c) and nonlinear parameter  $\nu$  (d) for each non interacting oscillator (STO 1 and STO 2) as a function of  $I_{DC}$  in their respective current source. These measurements have been obtained at room temperature and zero field.

27 **Supplement note 2: Characteristic of the phase noise in the synchronized state**

28 In the optimized synchronized state, corresponding to the largest synchronized bandwidth, i.e.  $\psi_{\Delta\tau} -$   
 29  $\psi_e \approx n\pi [\pi]$ , the phase sum and difference are defined by the following system of **Supplementary**  
 30 **Equation 1** (see Ref<sup>2</sup>):

$$\begin{cases} \frac{d\Phi}{dt} = -2\bar{\omega} + \xi_1(t) + \xi_2(t) & (1) \\ \frac{d\psi}{dt} = -\Delta\omega - 2F_e \sin \psi + \xi_1(t) - \xi_2(t) & (2) \end{cases}$$

31 where  $\xi_1(t)$  and  $\xi_2(t)$  are the white noise source in each STO,  $2\bar{\omega}$  the sum of the two STO frequencies  
 32  $\Delta\omega$  the frequency detuning and  $F_e$  the strength of the locking force. For almost identical oscillators, the  
 33 intensities of noise are equivalent (leading to similar spectral linewidths) and described by  
 34 **Supplementary Equation 3**:

$$\langle \xi_1(t) | \xi_2(t') \rangle = 2\sigma_0^2 \delta_{1,2} \delta(t - t') \quad (3)$$

35  
 36 Contrary to the phase difference, the phase sum  $\Phi$  has no retroaction process. Thus, the diffusion of the  
 37 phase sum turns out to be much larger than the diffusion of the phase difference with a diffusion constant  
 38  $D_\Phi = 2\sigma_0^2 \gg D_\psi$ . Given that the phases of each synchronized oscillator are  $\phi_1 = (\Phi + \psi)/2$  and  
 39  $\phi_2 = (\Phi - \psi)/2$ , their diffusion constants are then  $D_{s,1} = D_{s,2} = \sigma_0^2$ . Note that when the two STOs are  
 40 not interacting, their diffusion constants are  $D_1 = D_2 = 2\sigma_0^2$ . We thus deduce that the phase noise of the  
 41 synchronized STOs should decrease by a factor 2 compared to the value when they are independent.

42  
 43 **Supplement note 3: Estimation of the synchronization bandwidth**

44 As mentioned earlier, the two STOs are almost identical. In this case, the rf-current emitted by one STO  
 45 that will drive the second oscillator can be estimated by **Supplementary Equation 3**:

$$I_{rf,STO} = \frac{I_{rf,STO}}{\pi R^2} = \frac{\sqrt{P_{int}/R_{STO}}}{\pi R^2} \quad (3)$$

46  
 47 with R the dot radius of the STO,  $R_{STO}$  the STO resistance and  $P_{int}$  the power emitted by the STO. In our  
 48 experimental setup, the presence of a power divider used to detect the emitted power on a spectrum  
 49 analyzer results in a decrease by 6 dBm of the effective synchronizing signal that is applied on each  
 50 oscillator. The impedance mismatch between the circuit resistance (50  $\Omega$ ) and the oscillator resistance (32  
 51  $\Omega$ ) is also contributing to the decrease of the actual synchronizing rf-current. We estimate for this  
 52 effective synchronizing current  $I_{rf,eff} = (1 - R_{re})I_{rf,STO}/2$  with  $R_{re} = (50-32)/(50+32)$ .

53 The synchronization bandwidth is then expressed in the best conditions, i.e for  $\psi_{\Delta\tau} - \psi_e = n\pi [\pi]$ , by  
 54 **Supplementary Equation 5**:

$$\Delta\omega_{sync} = 2 \frac{\sqrt{1+v^2} \sqrt{\Lambda_{SL}^2 + \Lambda_{FL}^2}}{\sqrt{p_0}} I_{rf,eff} \quad (4)$$

55  
 56 and the normalized power by **Supplementary Equation 5**<sup>3</sup>:

$$p_0 = \frac{18P_{int}}{R_{load}} \left( \frac{R_{load} + R_{STO}}{I_{dc} \Delta R_{TMR}} \right)^2 \quad (5)$$

57  
 58  
 59 For the presented measurements,  $I_{rf,STO} = 0.5 \text{ mA}$ ,  $R_{STO} = 32 \Omega$ ,  $v = 3.4 - 3.7$ ,  $p_0 = 0.21$   
 60 ( $\Delta R_{TMR}(I_{dc}) \sim 14 \Omega$ ,  $R_{load} = 50 \Omega$ ,  $R_{STO} = 30 \Omega$ ,  $I_{dc} = 11 \text{ mA}$ ),  $R = 150 \text{ nm}$ , and  $\Lambda_{FL}^2$  and  $\Lambda_{SL}^2$  are taken  
 61 from Reference<sup>4</sup>. Injecting these parameters, we deduce  $\Delta\omega_{sync} \sim 1.6 - 2.1 \text{ MHz}$ . Note that this value is  
 62 in excellent agreement with our experimental observations (2.2 MHz).  
 63

---

64 **Supplement References**

- 65 1. Slavin, A. & Tiberkevich, V. Nonlinear Auto-Oscillator Theory of Microwave Generation by Spin-  
66 Polarized Current. *IEEE Transactions on Magnetics* 45, 1875–1918 (2009).
- 67 2. Pikovsky, A., Rosenblum, M. & Kurths, J. *A universal concept in nonlinear sciences*, Cambridge  
68 University Press (2001).
- 69 3. Grimaldi, E. et al. Response to noise of a vortex based spin transfer nano-oscillator. *Phys. Rev. B*  
70 89, 104404 (2014).
- 71 4. Jenkins, A. S. et al. Spin-torque resonant expulsion of the vortex core for an efficient  
72 radiofrequency detection scheme. *Nature Nanotechnology* (2016). doi:10.1038/nnano.2015.295

73

74

75

76

77

78
